# Supplementary material for: Chondrocytes Contribute to Alphaviral Disease Pathogenesis as a Source of Virus Replication and Soluble Factor Production
Source: MDPI journal article supplement (doi:10.3390/v10020086), 2018-02-15
Supplement: s1 [file s1]

## Supplementary material

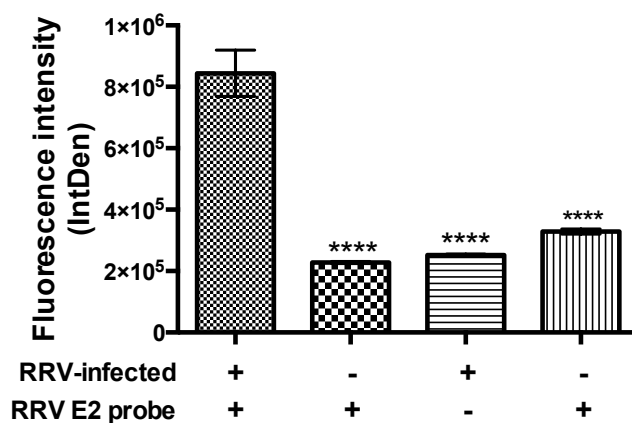

**Figure S1.** Murine chondrocyte cells are susceptible to RRV-infection. Fluorescence intensity of DIG-labelled RRV-specific RNA probe to joint sections of RRV-infected and mock-infected (PBS) mice. A negative control probe was also used to evaluate any non-specific RNA probe binding. Integrated density (IntDen) values were expressed as means with SEM. Statistical analysis was performed by one-way ANOVA followed by Dunnett's multiple comparisons test. \* $p < 0.05$ ; \*\* $p < 0.01$ , \*\*\* $p < 0.001$ , \*\*\*\* $p < 0.0001$ .
